# Supplementary material for: PCR effects of melting temperature adjustment of individual primers in degenerate primer pools
Source: PeerJ journal article supplement (doi:10.7717/peerj.6570), 2019-03-04
Supplement: Naqib_Figure_S3_Revised_Dec30.pdf [file Naqib_Figure_S3_Revised_Dec30.pdf]

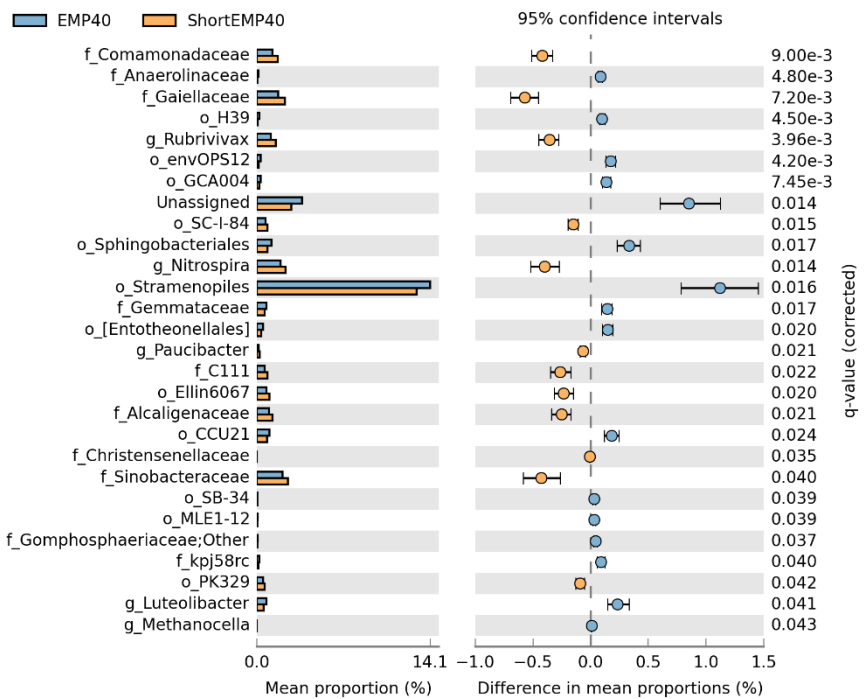

**40°C Annealing Temperature**

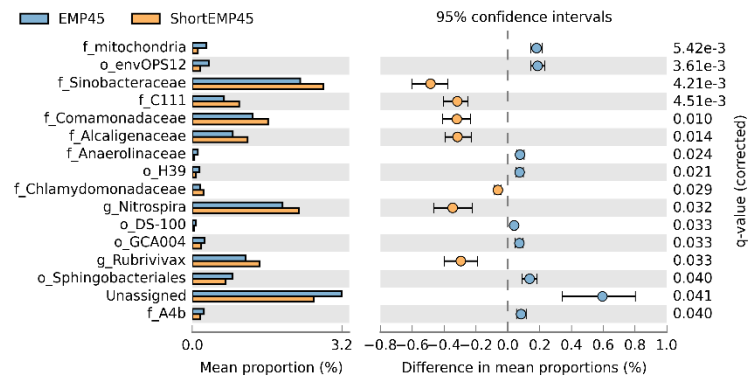

**45°C Annealing Temperature**

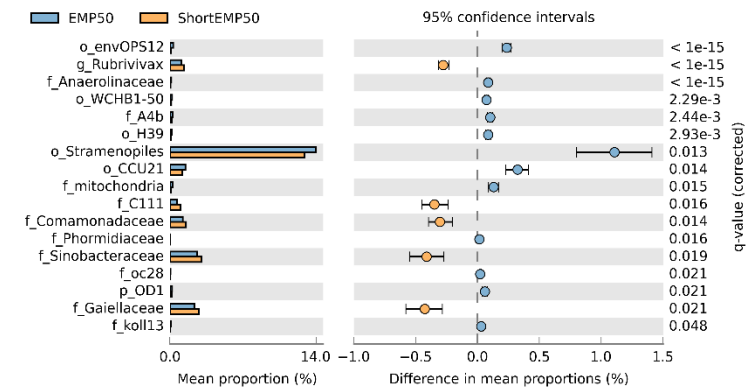

**50°C Annealing Temperature**
