# Supplementary material for: PCR effects of melting temperature adjustment of individual primers in degenerate primer pools
Source: PeerJ journal article supplement (doi:10.7717/peerj.6570), 2019-03-04

### (A) Lake Michigan Sediment

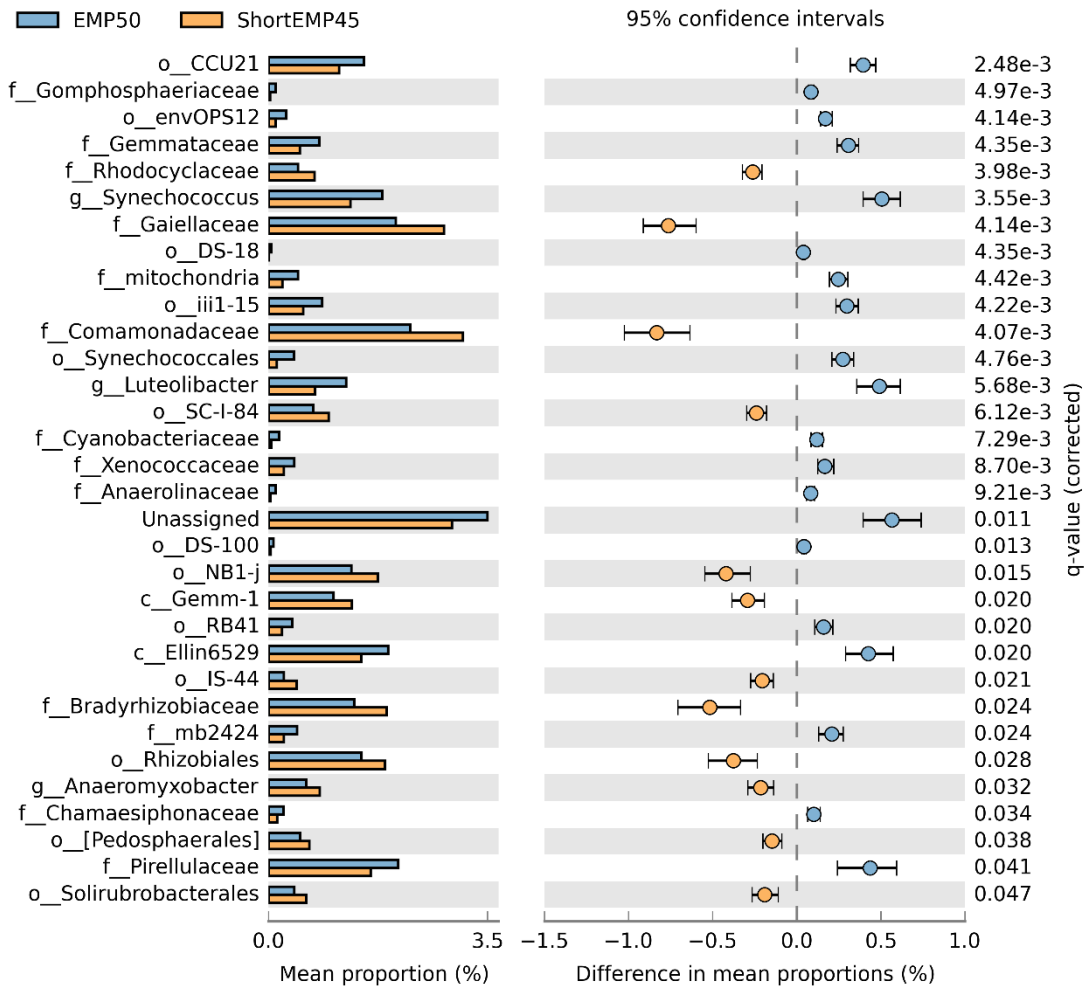

### (B) Feces

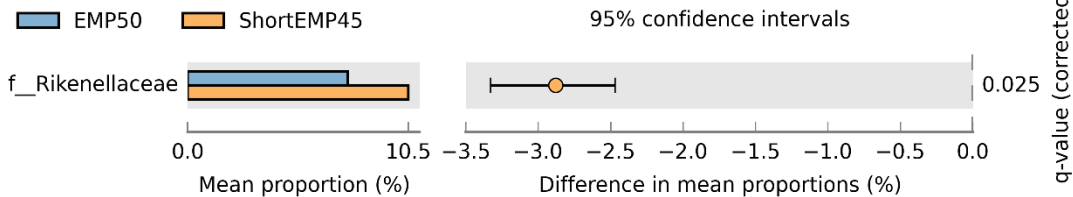

### (C) Soil

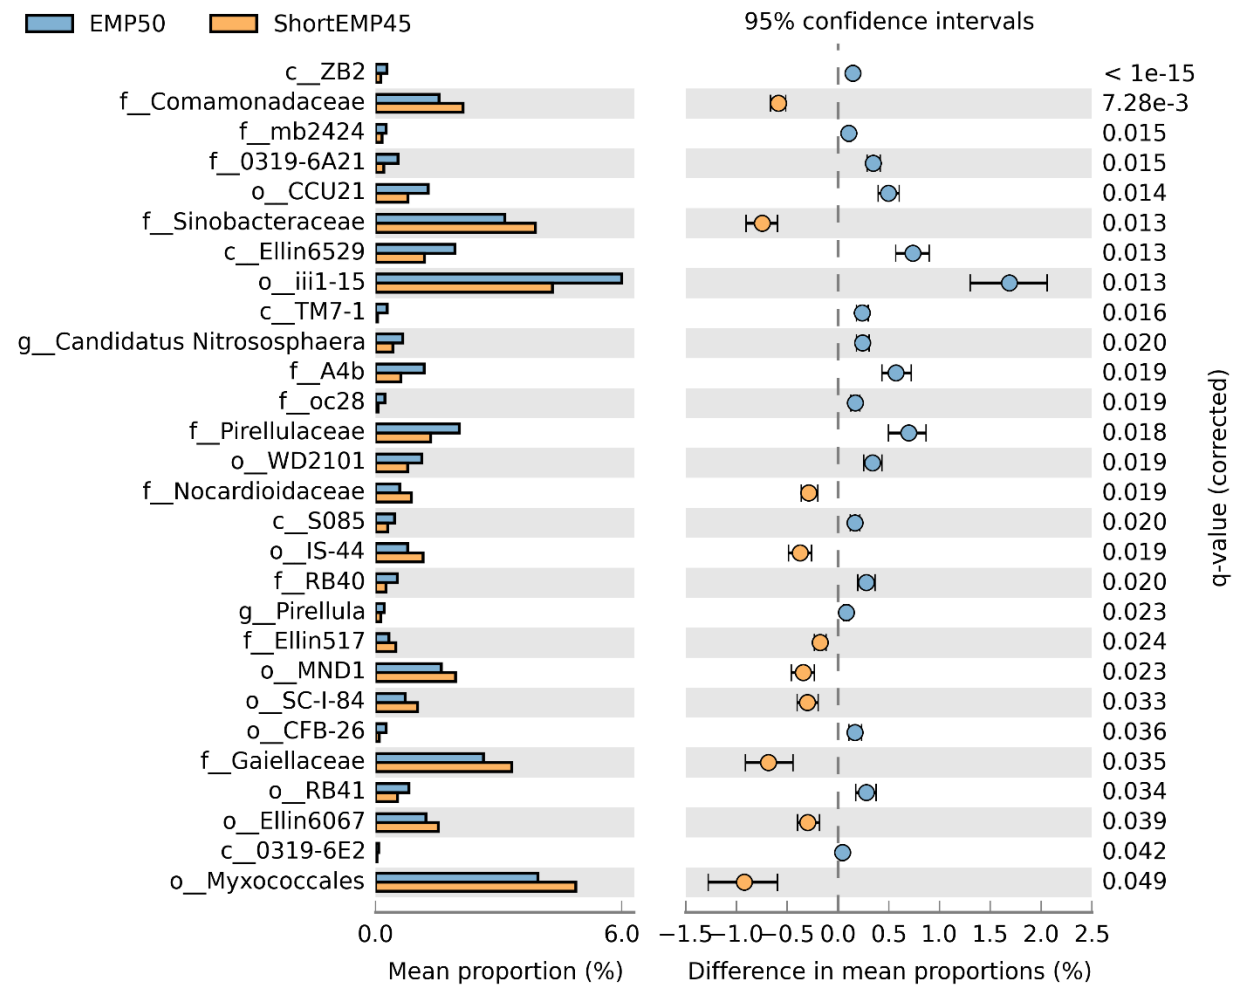

### (D) Zymo Standard

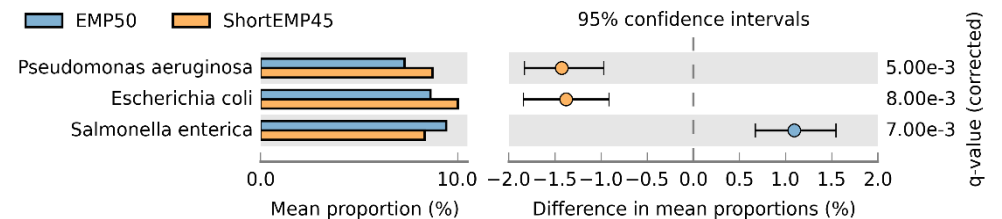

Supplement: Naqib_Figure_S4_Revised_Dec30.pdf [file Naqib_Figure_S4_Revised_Dec30.pdf]
