# Supplementary material for: PCR effects of melting temperature adjustment of individual primers in degenerate primer pools
Source: PubMed Central journal article supplement (PMC6404654; doi:10.7717/peerj.6570), 2019-03-04

**Bray-Curtis Dissimilarity**

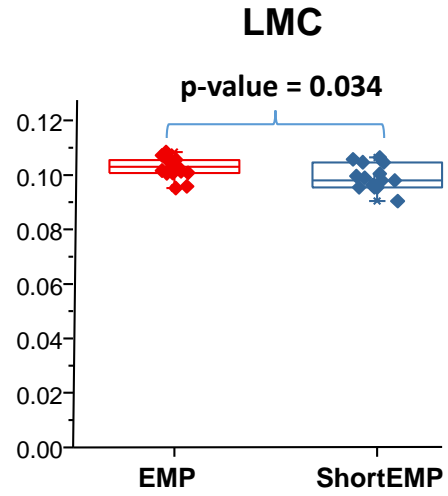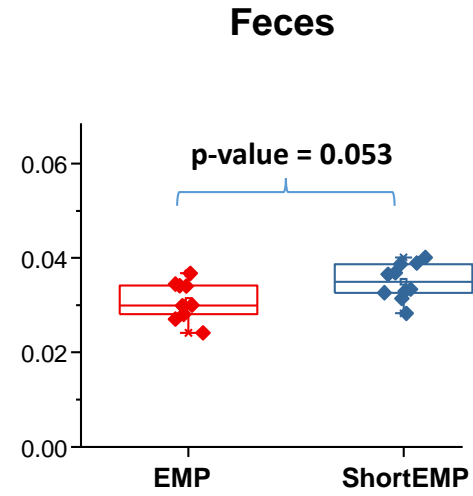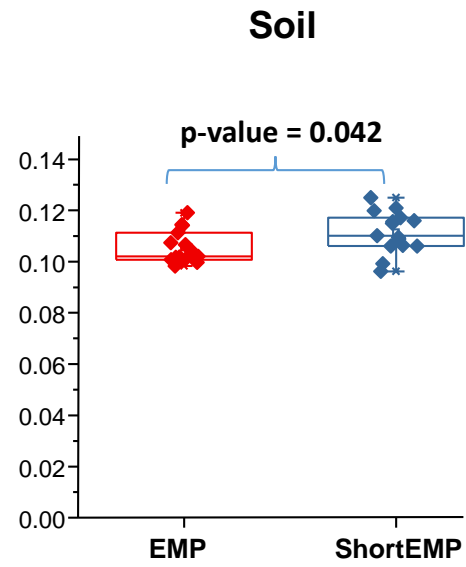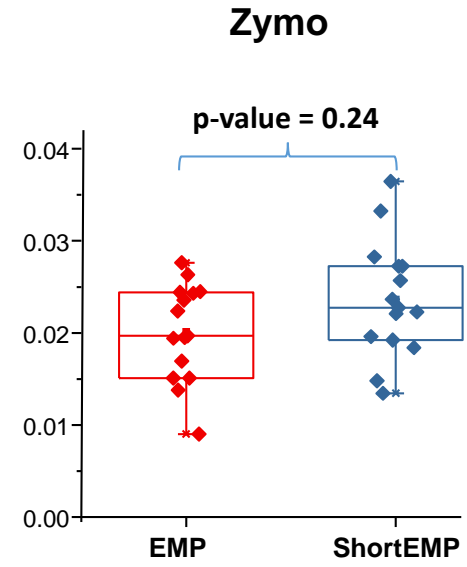

Supplement: peerj-07-6570-s001.pdf [file peerj-07-6570-s001.pdf]
