# Supplementary material for: PCR effects of melting temperature adjustment of individual primers in degenerate primer pools
Source: PubMed Central journal article supplement (PMC6404654; doi:10.7717/peerj.6570), 2019-03-04

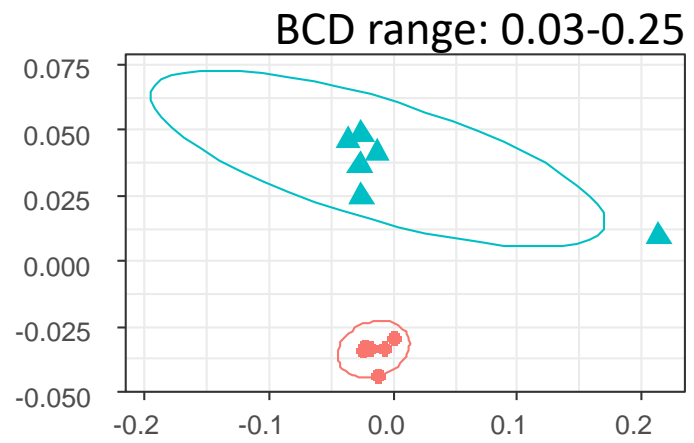

Primer

● EMP

▲ ShortEMP

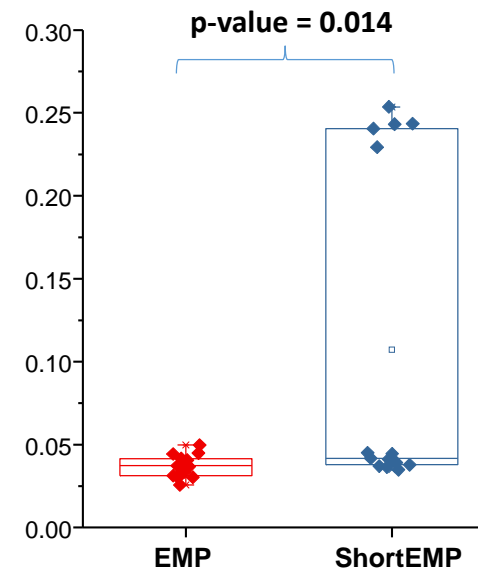

Supplement: peerj-07-6570-s002.pdf [file peerj-07-6570-s002.pdf]
