# Supplementary material for: PCR effects of melting temperature adjustment of individual primers in degenerate primer pools
Source: PeerJ. 2019 Mar 4;7:e6570. doi: 10.7717/peerj.6570 (PMC6404654; doi:10.7717/peerj.6570)
Supplement: Table S1 [file peerj-07-6570-s005.xlsx]

## Sheet: S1
		ORIGINAL				VARIANTS
	515F Variants	Tm (°C)	dG (kcal/mole)	Sequence	Length	New_Tm (°C)	New_dG (kcal/mole)				T/C					A/C													Degeneracies
	515Fb	67 - 72	-43.55	GTGYCAGCMGCCGCGGTAA	19	67 - 69	-41.12	G	T	G	Y	C	A	G	C	M	G	C	C	G	C	G	G	T	A	A			Y M
	515Fb_V1	69.6	-43.64	GTGTCAGCAGCCGCGGTAA	19	66.9	-40.34	G	T	G	T	C	A	G	C	A	G	C	C	G	C	G	G	T	A	A			T A
	515Fb_V2	71.8	-46.76	CCAGCCGCCGCGGTAA	16	67.1	-40.33				C	C	A	G	C	C	G	C	C	G	C	G	G	T	A	A			C C
	515Fb_V3	66.9	-40.34	TGCCAGCAGCCGCGGTAA	18	69.1	-42.29		T	G	C	C	A	G	C	A	G	C	C	G	C	G	G	T	A	A			C A
	515Fb_V4	69.1	-43.47	GTGTCAGCCGCCGCGGTA	18	69	-41.53	G	T	G	T	C	A	G	C	C	G	C	C	G	C	G	G	T	A				T C
	806R Variants														A/C/G/T	A/C/G					A/T
	806Rb	54.7 - 61.7	-35.55	GGACTACNVGGGTWTCTAAT	20	53.6 - 56.6	-31.25	G	G	A	C	T	A	C	N	V	G	G	G	T	W	T	C	T	A	A	T		N V W
	806Rb_V1	55.7	-32.85	GGACTACAAGGGTATCTAA	19	54.9	-31.38	G	G	A	C	T	A	C	A	A	G	G	G	T	A	T	C	T	A	A			A A A
	806Rb_V2	57.4	-33.98	GACTACCAGGGTATCTAAT	19	54.7	-30.91		G	A	C	T	A	C	C	A	G	G	G	T	A	T	C	T	A	A	T		C A A
	806Rb_V3	57.4	-34.14	GGACTACGAGGGTATCTA	18	55.9	-30.72	G	G	A	C	T	A	C	G	A	G	G	G	T	A	T	C	T	A				G A A
	806Rb_V4	54.5	-31.52	GGACTACTAGGGTATCTAAT	20	54.5	-31.52	G	G	A	C	T	A	C	T	A	G	G	G	T	A	T	C	T	A	A	T		T A A
	806Rb_V5	58	-34.26	GACTACACGGGTATCTAAT	19	55.3	-31.2		G	A	C	T	A	C	A	C	G	G	G	T	A	T	C	T	A	A	T		A C A
	806Rb_V6	59.8	-37.11	CTACCCGGGTATCTAAT	17	53.6	-31.12				C	T	A	C	C	C	G	G	G	T	A	T	C	T	A	A	T		C C A
	806Rb_V7	60.5	-37.72	CTACGCGGGTATCTAAT	17	54.7	-31.73				C	T	A	C	G	C	G	G	G	T	A	T	C	T	A	A	T		G C A
	806Rb_V8	57.4	-34.14	GGACTACTCGGGTATCTA	18	55.9	-30.72	G	G	A	C	T	A	C	T	C	G	G	G	T	A	T	C	T	A				T C A
	806Rb_V9	57.4	-33.98	GACTACAGGGGTATCTAAT	19	54.7	-30.91		G	A	C	T	A	C	A	G	G	G	G	T	A	T	C	T	A	A	T		A G A
	806Rb_V10	59.8	-37.11	GGACTACCGGGGTATC	16	56.6	-31.13	G	G	A	C	T	A	C	C	G	G	G	G	T	A	T	C						C G A
	806Rb_V11	59.8	-37.11	CTACGGGGGTATCTAAT	17	53.6	-31.12				C	T	A	C	G	G	G	G	G	T	A	T	C	T	A	A	T		G G A
	806Rb_V12	57.4	-33.98	GACTACTGGGGTATCTAAT	19	54.7	-30.91		G	A	C	T	A	C	T	G	G	G	G	T	A	T	C	T	A	A	T		T G A
	806Rb_V13	56.7	-34.31	GGACTACAAGGGTTTCTA	18	55.1	-30.89	G	G	A	C	T	A	C	A	A	G	G	G	T	T	T	C	T	A				A A T
	806Rb_V14	58.5	-35.43	ACTACCAGGGTTTCTAAT	18	54.6	-30.79			A	C	T	A	C	C	A	G	G	G	T	T	T	C	T	A	A	T		C A T
	806Rb_V15	58.4	-35.6	ACTACGAGGGTTTCTAAT	18	54.6	-30.95			A	C	T	A	C	G	A	G	G	G	T	T	T	C	T	A	A	T		G A T
	806Rb_V16	55.6	-32.97	GGACTACTAGGGTTTCTAA	19	54.8	-31.49	G	G	A	C	T	A	C	T	A	G	G	G	T	T	T	C	T	A	A			T A T
	806Rb_V17	59	-35.72	GACTACACGGGTTTCTAA	18	55.7	-31.17		G	A	C	T	A	C	A	C	G	G	G	T	T	T	C	T	A	A			A C T
	806Rb_V18	60.8	-38.56	ACTACCCGGGTTTCTAA	17	56.5	-32.44			A	C	T	A	C	C	C	G	G	G	T	T	T	C	T	A	A			C C T
	806Rb_V19	61.5	-39.17	ACTACGCGGGTTTCTA	16	56.6	-31.11			A	C	T	A	C	G	C	G	G	G	T	T	T	C	T	A				G C T
	806Rb_V20	58.4	-35.6	ACTACTCGGGTTTCTAAT	18	54.6	-30.95			A	C	T	A	C	T	C	G	G	G	T	T	T	C	T	A	A	T		T C T
	806Rb_V21	58.5	-35.43	ACTACAGGGGTTTCTAAT	18	54.6	-30.79			A	C	T	A	C	A	G	G	G	G	T	T	T	C	T	A	A	T		A G T
	806Rb_V22	60.8	-38.56	CTACCGGGGTTTCTAAT	17	54.8	-32.57				C	T	A	C	C	G	G	G	G	T	T	T	C	T	A	A	T		C G T
	806Rb_V23	60.8	-38.56	CTACGGGGGTTTCTAAT	17	54.8	-32.57				C	T	A	C	G	G	G	G	G	T	T	T	C	T	A	A	T		G G T
	806Rb_V24	58.5	-35.43	ACTACTGGGGTTTCTAAT	18	54.6	-30.79			A	C	T	A	C	T	G	G	G	G	T	T	T	C	T	A	A	T		T G T
