# Supplementary material for: PCR effects of melting temperature adjustment of individual primers in degenerate primer pools
Source: PeerJ. 2019 Mar 4;7:e6570. doi: 10.7717/peerj.6570 (PMC6404654; doi:10.7717/peerj.6570)
Supplement: Table S2 [file peerj-07-6570-s006.xlsx]

## Sheet: S2
ShortEMP Pool Primers (CS1_806R_pool and CS2_515F_pool)
	515Fb variants	Modified Gene-Specific Portion of Primer Sequence	Length	Linker (CS2) Sequence	Final Sequence Name	Final Sequence Ordered from IDT	Final Length
	515Fb_V1	GTGTCAGCAGCCGCGGTAA	19	TACGGTAGCAGAGACTTGGTCT	>CS2_515Fb_V1	TACGGTAGCAGAGACTTGGTCTGTGTCAGCAGCCGCGGTAA	41
	515Fb_V2	CCAGCCGCCGCGGTAA	16	TACGGTAGCAGAGACTTGGTCT	>CS2_515Fb_V2	TACGGTAGCAGAGACTTGGTCTCCAGCCGCCGCGGTAA	38
	515Fb_V3	TGCCAGCAGCCGCGGTAA	18	TACGGTAGCAGAGACTTGGTCT	>CS2_515Fb_V3	TACGGTAGCAGAGACTTGGTCTTGCCAGCAGCCGCGGTAA	40
	515Fb_V4	GTGTCAGCCGCCGCGGTA	18	TACGGTAGCAGAGACTTGGTCT	>CS2_515Fb_V4	TACGGTAGCAGAGACTTGGTCTGTGTCAGCCGCCGCGGTA	40
	806Rb variants	Modified Gene-Specific Portion of Primer Sequence	Length	Linker (CS1) Sequence	Final Sequence Name	Final Sequence Ordered from IDT	Final Length
	806Rb_V1	GGACTACAAGGGTATCTAA	19	ACACTGACGACATGGTTCTACA	>CS1_806Rb_V1	ACACTGACGACATGGTTCTACAGGACTACAAGGGTATCTAA	41
	806Rb_V2	GACTACCAGGGTATCTAAT	19	ACACTGACGACATGGTTCTACA	>CS1_806Rb_V2	ACACTGACGACATGGTTCTACAGACTACCAGGGTATCTAAT	41
	806Rb_V3	GGACTACGAGGGTATCTA	18	ACACTGACGACATGGTTCTACA	>CS1_806Rb_V3	ACACTGACGACATGGTTCTACAGGACTACGAGGGTATCTA	40
	806Rb_V4	GGACTACTAGGGTATCTAAT	20	ACACTGACGACATGGTTCTACA	>CS1_806Rb_V4	ACACTGACGACATGGTTCTACAGGACTACTAGGGTATCTAAT	42
	806Rb_V5	GACTACACGGGTATCTAAT	19	ACACTGACGACATGGTTCTACA	>CS1_806Rb_V5	ACACTGACGACATGGTTCTACAGACTACACGGGTATCTAAT	41
	806Rb_V6	CTACCCGGGTATCTAAT	17	ACACTGACGACATGGTTCTACA	>CS1_806Rb_V6	ACACTGACGACATGGTTCTACACTACCCGGGTATCTAAT	39
	806Rb_V7	CTACGCGGGTATCTAAT	17	ACACTGACGACATGGTTCTACA	>CS1_806Rb_V7	ACACTGACGACATGGTTCTACACTACGCGGGTATCTAAT	39
	806Rb_V8	GGACTACTCGGGTATCTA	18	ACACTGACGACATGGTTCTACA	>CS1_806Rb_V8	ACACTGACGACATGGTTCTACAGGACTACTCGGGTATCTA	40
	806Rb_V9	GACTACAGGGGTATCTAAT	19	ACACTGACGACATGGTTCTACA	>CS1_806Rb_V9	ACACTGACGACATGGTTCTACAGACTACAGGGGTATCTAAT	41
	806Rb_V10	GGACTACCGGGGTATC	16	ACACTGACGACATGGTTCTACA	>CS1_806Rb_V10	ACACTGACGACATGGTTCTACAGGACTACCGGGGTATC	38
	806Rb_V11	CTACGGGGGTATCTAAT	17	ACACTGACGACATGGTTCTACA	>CS1_806Rb_V11	ACACTGACGACATGGTTCTACACTACGGGGGTATCTAAT	39
	806Rb_V12	GACTACTGGGGTATCTAAT	19	ACACTGACGACATGGTTCTACA	>CS1_806Rb_V12	ACACTGACGACATGGTTCTACAGACTACTGGGGTATCTAAT	41
	806Rb_V13	GGACTACAAGGGTTTCTA	18	ACACTGACGACATGGTTCTACA	>CS1_806Rb_V13	ACACTGACGACATGGTTCTACAGGACTACAAGGGTTTCTA	40
	806Rb_V14	ACTACCAGGGTTTCTAAT	18	ACACTGACGACATGGTTCTACA	>CS1_806Rb_V14	ACACTGACGACATGGTTCTACAACTACCAGGGTTTCTAAT	40
	806Rb_V15	ACTACGAGGGTTTCTAAT	18	ACACTGACGACATGGTTCTACA	>CS1_806Rb_V15	ACACTGACGACATGGTTCTACAACTACGAGGGTTTCTAAT	40
	806Rb_V16	GGACTACTAGGGTTTCTAA	19	ACACTGACGACATGGTTCTACA	>CS1_806Rb_V16	ACACTGACGACATGGTTCTACAGGACTACTAGGGTTTCTAA	41
	806Rb_V17	GACTACACGGGTTTCTAA	18	ACACTGACGACATGGTTCTACA	>CS1_806Rb_V17	ACACTGACGACATGGTTCTACAGACTACACGGGTTTCTAA	40
	806Rb_V18	ACTACCCGGGTTTCTAA	17	ACACTGACGACATGGTTCTACA	>CS1_806Rb_V18	ACACTGACGACATGGTTCTACAACTACCCGGGTTTCTAA	39
	806Rb_V19	ACTACGCGGGTTTCTA	16	ACACTGACGACATGGTTCTACA	>CS1_806Rb_V19	ACACTGACGACATGGTTCTACAACTACGCGGGTTTCTA	38
	806Rb_V20	ACTACTCGGGTTTCTAAT	18	ACACTGACGACATGGTTCTACA	>CS1_806Rb_V20	ACACTGACGACATGGTTCTACAACTACTCGGGTTTCTAAT	40
	806Rb_V21	ACTACAGGGGTTTCTAAT	18	ACACTGACGACATGGTTCTACA	>CS1_806Rb_V21	ACACTGACGACATGGTTCTACAACTACAGGGGTTTCTAAT	40
	806Rb_V22	CTACCGGGGTTTCTAAT	17	ACACTGACGACATGGTTCTACA	>CS1_806Rb_V22	ACACTGACGACATGGTTCTACACTACCGGGGTTTCTAAT	39
	806Rb_V23	CTACGGGGGTTTCTAAT	17	ACACTGACGACATGGTTCTACA	>CS1_806Rb_V23	ACACTGACGACATGGTTCTACACTACGGGGGTTTCTAAT	39
	806Rb_V24	ACTACTGGGGTTTCTAAT	18	ACACTGACGACATGGTTCTACA	>CS1_806Rb_V24	ACACTGACGACATGGTTCTACAACTACTGGGGTTTCTAAT	40
EMP Primers (CS1_806R and CS2_515F)
	Original EMP	Original Gene-Specific Primer Sequence	Length	Linker (CS1 or CS2) Sequence	Final Sequence Name	Final Sequence Ordered from IDT	Final Length
	515F_EMP	GTGYCAGCMGCCGCGGTAA	19	TACGGTAGCAGAGACTTGGTCT	>CS2_515F_EMP	TACGGTAGCAGAGACTTGGTCTGTGYCAGCMGCCGCGGTAA	41
	806R_EMP	GGACTACNVGGGTWTCTAAT	20	ACACTGACGACATGGTTCTACA	>CS1_806R_EMP	ACACTGACGACATGGTTCTACAGGACTACNVGGGTWTCTAAT	42
LongEMP Primers (modified from Lunderberg et al. 2013) - CS1_806_long_pool and CS2_806R_long_pool
	Long EMP	Original Gene-Specific Primer Sequence	Length	Linker (CS1 or CS2) Sequence	Final Sequence Name	Final Sequence Ordered from IDT	Final Length
	Long_515Fb_V1	GAGTGYCAGCMGCCGCGGTAA	21	TACGGTAGCAGAGACTTGGTCT	>CS2_515F_LongEMP_V1	TACGGTAGCAGAGACTTGGTCTGAGTGYCAGCMGCCGCGGTAA	43
	Long_515Fb_V2	TGAGTGYCAGCMGCCGCGGTAA	22	TACGGTAGCAGAGACTTGGTCT	>CS2_515F_LongEMP_V2	TACGGTAGCAGAGACTTGGTCTTGAGTGYCAGCMGCCGCGGTAA	44
	Long_515Fb_V3	CTGAGTGYCAGCMGCCGCGGTAA	23	TACGGTAGCAGAGACTTGGTCT	>CS2_515F_LongEMP_V3	TACGGTAGCAGAGACTTGGTCTCTGAGTGYCAGCMGCCGCGGTAA	45
	Long_515Fb_V4	ACTGAGTGYCAGCMGCCGCGGTAA	24	TACGGTAGCAGAGACTTGGTCT	>CS2_515F_LongEMP_V4	TACGGTAGCAGAGACTTGGTCTACTGAGTGYCAGCMGCCGCGGTAA	46
	Long_515Fb_V5	GACTGAGTGYCAGCMGCCGCGGTAA	25	TACGGTAGCAGAGACTTGGTCT	>CS2_515F_LongEMP_V5	TACGGTAGCAGAGACTTGGTCTGACTGAGTGYCAGCMGCCGCGGTAA	47
	Long_515Fb_V6	TGACTGAGTGYCAGCMGCCGCGGTAA	26	TACGGTAGCAGAGACTTGGTCT	>CS2_515F_LongEMP_V6	TACGGTAGCAGAGACTTGGTCTTGACTGAGTGYCAGCMGCCGCGGTAA	48
	Long_806Rb_V1	ACGGACTACNVGGGTWTCTAAT	22	ACACTGACGACATGGTTCTACA	>CS1_806R_LongEMP_V1	ACACTGACGACATGGTTCTACAACGGACTACNVGGGTWTCTAAT	44
	Long_806Rb_V2	TACGGACTACNVGGGTWTCTAAT	23	ACACTGACGACATGGTTCTACA	>CS1_806R_LongEMP_V2	ACACTGACGACATGGTTCTACATACGGACTACNVGGGTWTCTAAT	45
	Long_806Rb_V3	CTACGGACTACNVGGGTWTCTAAT	24	ACACTGACGACATGGTTCTACA	>CS1_806R_LongEMP_V3	ACACTGACGACATGGTTCTACACTACGGACTACNVGGGTWTCTAAT	46
	Long_806Rb_V4	ACTACGGACTACNVGGGTWTCTAAT	25	ACACTGACGACATGGTTCTACA	>CS1_806R_LongEMP_V4	ACACTGACGACATGGTTCTACAACTACGGACTACNVGGGTWTCTAAT	47
	Long_806Rb_V5	GACTACGGACTACNVGGGTWTCTAAT	26	ACACTGACGACATGGTTCTACA	>CS1_806R_LongEMP_V5	ACACTGACGACATGGTTCTACAGACTACGGACTACNVGGGTWTCTAAT	48
	Long_806Rb_V6	TGACTACGGACTACNVGGGTWTCTAAT	27	ACACTGACGACATGGTTCTACA	>CS1_806R_LongEMP_V6	ACACTGACGACATGGTTCTACATGACTACGGACTACNVGGGTWTCTAAT	49
NoLinker_ShortEMP Primers
	515Fb variants	Modified Gene-Specific Portion of Primer Sequence	Length	Linker (CS2) Sequence	Final Sequence Name	Final Sequence Ordered from IDT	Final Length
	515Fb_V1	GTGTCAGCAGCCGCGGTAA	19	none	>NoCS_515Fb_V1	GTGTCAGCAGCCGCGGTAA	19
	515Fb_V2	CCAGCCGCCGCGGTAA	16	none	>NoCS_515Fb_V2	CCAGCCGCCGCGGTAA	16
	515Fb_V3	TGCCAGCAGCCGCGGTAA	18	none	>NoCS_515Fb_V3	TGCCAGCAGCCGCGGTAA	18
	515Fb_V4	GTGTCAGCCGCCGCGGTA	18	none	>NoCS_515Fb_V4	GTGTCAGCCGCCGCGGTA	18
	806Rb variants	Modified Gene-Specific Portion of Primer Sequence	Length	Linker (CS1) Sequence	Final Sequence Name	Final Sequence Ordered from IDT	Final Length
	806Rb_V1	GGACTACAAGGGTATCTAA	19	none	>NoCS_806Rb_V1	GGACTACAAGGGTATCTAA	19
	806Rb_V2	GACTACCAGGGTATCTAAT	19	none	>NoCS_806Rb_V2	GACTACCAGGGTATCTAAT	19
	806Rb_V3	GGACTACGAGGGTATCTA	18	none	>NoCS_806Rb_V3	GGACTACGAGGGTATCTA	18
	806Rb_V4	GGACTACTAGGGTATCTAAT	20	none	>NoCS_806Rb_V4	GGACTACTAGGGTATCTAAT	20
	806Rb_V5	GACTACACGGGTATCTAAT	19	none	>NoCS_806Rb_V5	GACTACACGGGTATCTAAT	19
	806Rb_V6	CTACCCGGGTATCTAAT	17	none	>NoCS_806Rb_V6	CTACCCGGGTATCTAAT	17
	806Rb_V7	CTACGCGGGTATCTAAT	17	none	>NoCS_806Rb_V7	CTACGCGGGTATCTAAT	17
	806Rb_V8	GGACTACTCGGGTATCTA	18	none	>NoCS_806Rb_V8	GGACTACTCGGGTATCTA	18
	806Rb_V9	GACTACAGGGGTATCTAAT	19	none	>NoCS_806Rb_V9	GACTACAGGGGTATCTAAT	19
	806Rb_V10	GGACTACCGGGGTATC	16	none	>NoCS_806Rb_V10	GGACTACCGGGGTATC	16
	806Rb_V11	CTACGGGGGTATCTAAT	17	none	>NoCS_806Rb_V11	CTACGGGGGTATCTAAT	17
	806Rb_V12	GACTACTGGGGTATCTAAT	19	none	>NoCS_806Rb_V12	GACTACTGGGGTATCTAAT	19
	806Rb_V13	GGACTACAAGGGTTTCTA	18	none	>NoCS_806Rb_V13	GGACTACAAGGGTTTCTA	18
	806Rb_V14	ACTACCAGGGTTTCTAAT	18	none	>NoCS_806Rb_V14	ACTACCAGGGTTTCTAAT	18
	806Rb_V15	ACTACGAGGGTTTCTAAT	18	none	>NoCS_806Rb_V15	ACTACGAGGGTTTCTAAT	18
	806Rb_V16	GGACTACTAGGGTTTCTAA	19	none	>NoCS_806Rb_V16	GGACTACTAGGGTTTCTAA	19
	806Rb_V17	GACTACACGGGTTTCTAA	18	none	>NoCS_806Rb_V17	GACTACACGGGTTTCTAA	18
	806Rb_V18	ACTACCCGGGTTTCTAA	17	none	>NoCS_806Rb_V18	ACTACCCGGGTTTCTAA	17
	806Rb_V19	ACTACGCGGGTTTCTA	16	none	>NoCS_806Rb_V19	ACTACGCGGGTTTCTA	16
	806Rb_V20	ACTACTCGGGTTTCTAAT	18	none	>NoCS_806Rb_V20	ACTACTCGGGTTTCTAAT	18
	806Rb_V21	ACTACAGGGGTTTCTAAT	18	none	>NoCS_806Rb_V21	ACTACAGGGGTTTCTAAT	18
	806Rb_V22	CTACCGGGGTTTCTAAT	17	none	>NoCS_806Rb_V22	CTACCGGGGTTTCTAAT	17
	806Rb_V23	CTACGGGGGTTTCTAAT	17	none	>NoCS_806Rb_V23	CTACGGGGGTTTCTAAT	17
	806Rb_V24	ACTACTGGGGTTTCTAAT	18	none	>NoCS_806Rb_V24	ACTACTGGGGTTTCTAAT	18
