# Supplementary material for: PCR effects of melting temperature adjustment of individual primers in degenerate primer pools
Source: PeerJ. 2019 Mar 4;7:e6570. doi: 10.7717/peerj.6570 (PMC6404654; doi:10.7717/peerj.6570)
Supplement: Table S4 [file peerj-07-6570-s008.xlsx]

## Sheet: S4
	EMP 515F	Length/Nuleotide Position	1	2	3	4	5	6	7	8	9	10	11	12	13	14	15	16
	GTGCCAGCAGCCGCGGTAA	19	G	T	G	C	C	A	G	C	A	G	C	C	G	C	G	G
	GTGCCAGCCGCCGCGGTAA	19	G	T	G	C	C	A	G	C	C	G	C	C	G	C	G	G
	GTGTCAGCAGCCGCGGTAA	19	G	T	G	T	C	A	G	C	A	G	C	C	G	C	G	G
	GTGTCAGCCGCCGCGGTAA	19	G	T	G	T	C	A	G	C	C	G	C	C	G	C	G	G
		A	-	-	-	-	-	4	-	-	2	-	-	-	-	-	-	-
		C	-	-	-	2	4	-	-	4	2	-	4	4	-	4	-	-
		T	-	4	-	2	-	-	-	-	-	-	-	-	-	-	-	-
		G	4	-	4	-	-	-	4	-	-	4	-	-	4	-	4	4
		Total	1	1	1	2	1	1	1	1	2	1	1	1	1	1	1	1
		Shannon Index	0	0	0	0.693147	0	0	0	0	0.693147	0	0	0	0	0	0	0
	Starting Nucleotide Diversity	1.125
	Average Shannon Index	0.0866434
	ShortEMP 515F	Length/Nuleotide Position	1	2	3	4	5	6	7	8	9	10	11	12	13	14	15	16
	GTGTCAGCAGCCGCGGTAA	19	G	T	G	T	C	A	G	C	A	G	C	C	G	C	G	G
	CCAGCCGCCGCGGTAA	16	C	C	A	G	C	C	G	C	C	G	C	G	G	T	A	A
	TGCCAGCAGCCGCGGTAA	18	T	G	C	C	A	G	C	A	G	C	C	G	C	G	G	T
	GTGTCAGCCGCCGCGGTA	18	G	T	G	T	C	A	G	C	C	G	C	C	G	C	G	G
		A	-	-	1	-	1	2	-	1	1	-	-	-	-	-	1	1
		C	1	1	1	1	3	1	1	3	2	1	4	2	1	2	-	-
		T	1	2	-	2	-	-	-	-	-	-	-	-	-	1	-	1
		G	2	1	2	1	-	1	3	-	1	3	-	2	3	1	3	2
		Total	3	3	3	3	2	3	2	2	3	2	1	2	2	3	2	3
		Shannon Index	1.03972	1.03972	1.03972	1.03972	0.562335	1.03972	0.562335	0.562335	1.03972	0.562335	0	0.693147	0.562335	1.03972	0.562335	1.03972
	Starting Nucleotide Diversity	2.4375
	Average Shannon Index	0.774058
	Highest Possible Starting Nucleotide Diversity	4
	Highest Possible Shannon Index	1.39
